# Supplementary material
Source: PubMed Central journal article supplement (PMC11186477)

# CARDIAC PROTEIN KINASE D1 ABLATION ALTERS THE MYOCYTES $\beta$ -ADRENERGIC RESPONSE

## SUPPLEMENTARY MATERIALS

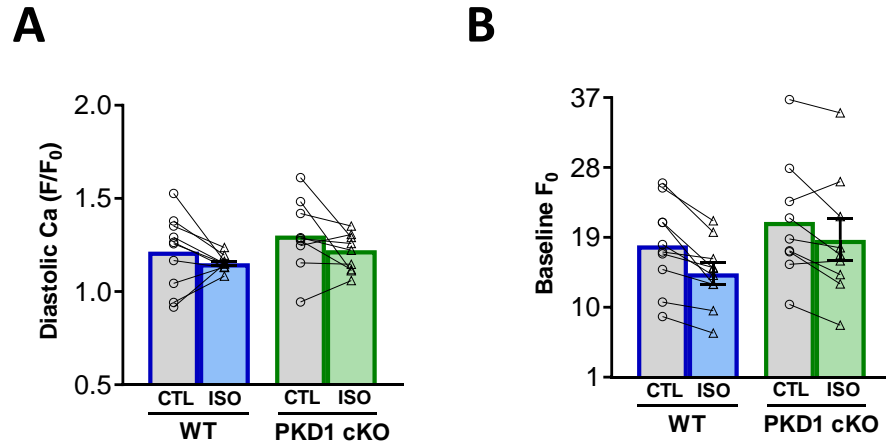

**FIGURE S1.** Diastolic Ca<sup>2+</sup> changes were comparable in both WT and PKD1 cKO myocytes. **A**, Diastolic Ca<sup>2+</sup> during pacing (minimum during pacing, F/F<sub>0</sub>). **B**, baseline fluorescence (at rest, non-paced, F<sub>0</sub>=F<sub>cell</sub>-F<sub>background</sub>). Same recordings as in Figure 1. Data points represent cells (WT, n = 9; KO, n = 8). Mice: WT, N = 5; KO, N = 4. Data are presented as mean  $\pm$  SEM. Two-way ANOVA, followed by Tukey's multiple comparisons test. Differences were considered statistically significant if P < 0.05.

## FULL BLOTS USED ON FIGURE 5A-D

WT= wild type, KO= PKD1 cKO, Sal= saline, Iso= isoproterenol.

Blots were cut to probe separately with different antibodies and imaged in the ChemiDoc™ MP Imaging System (Bio-Rad) (see methods section in the manuscript).

The samples used in Figure 5A-D are labelled in **bold red font**.

MW marker: Precision Plus Protein Dual Color Standards (Bio-Rad).

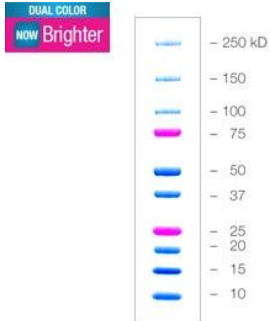

### Full blots used on Figure 5Aa

## GAPDH

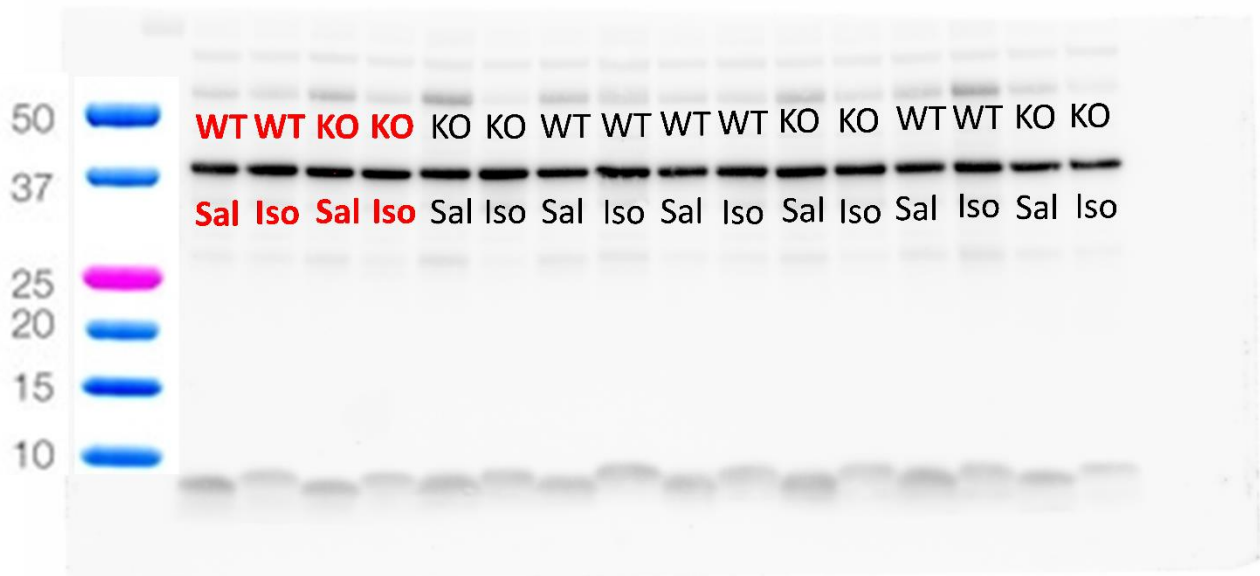

## Total PLB

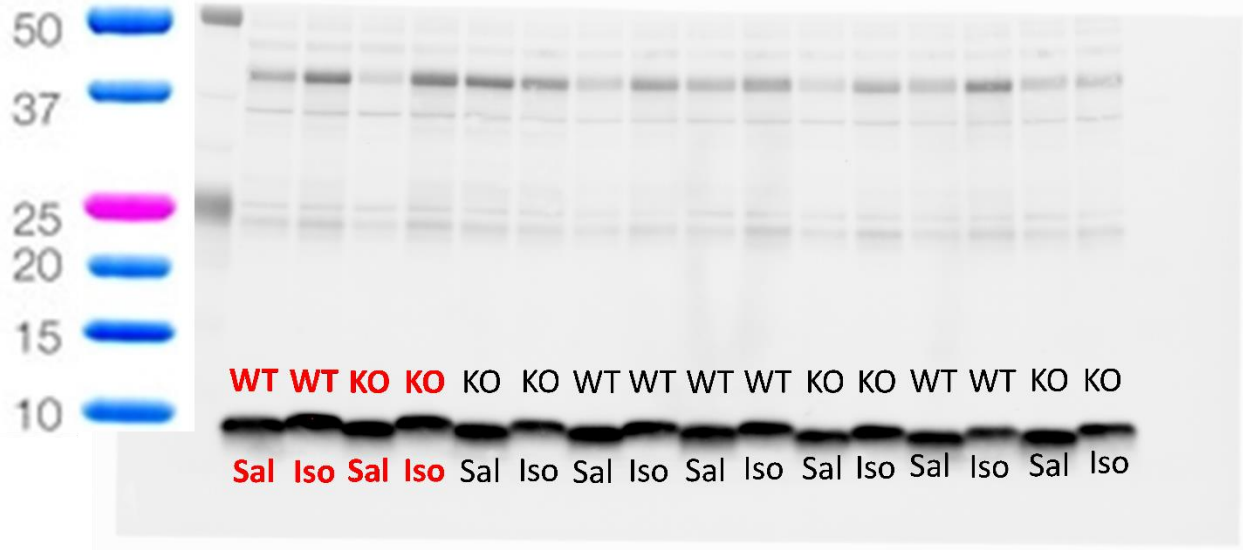

## pPLB

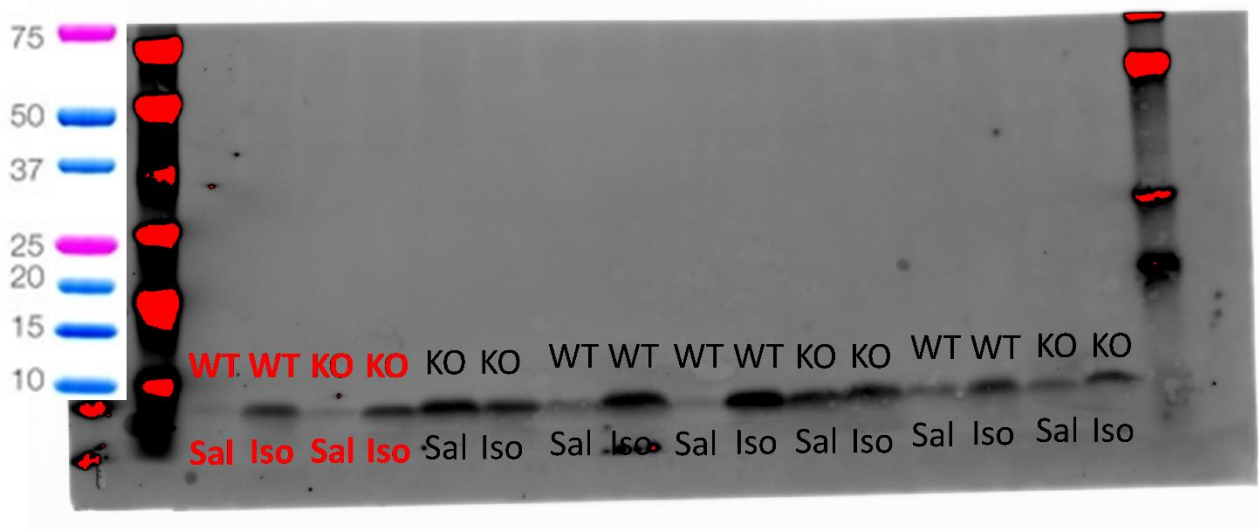

Full blots used on Figure 5Ba

## GAPDH

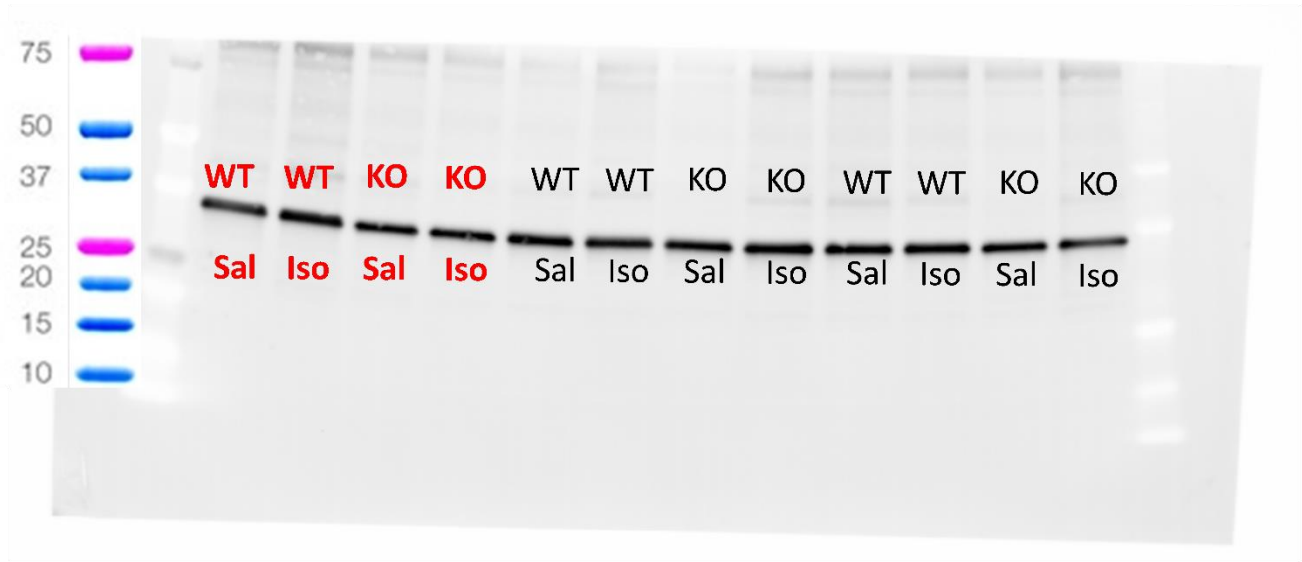

## Total Tnl

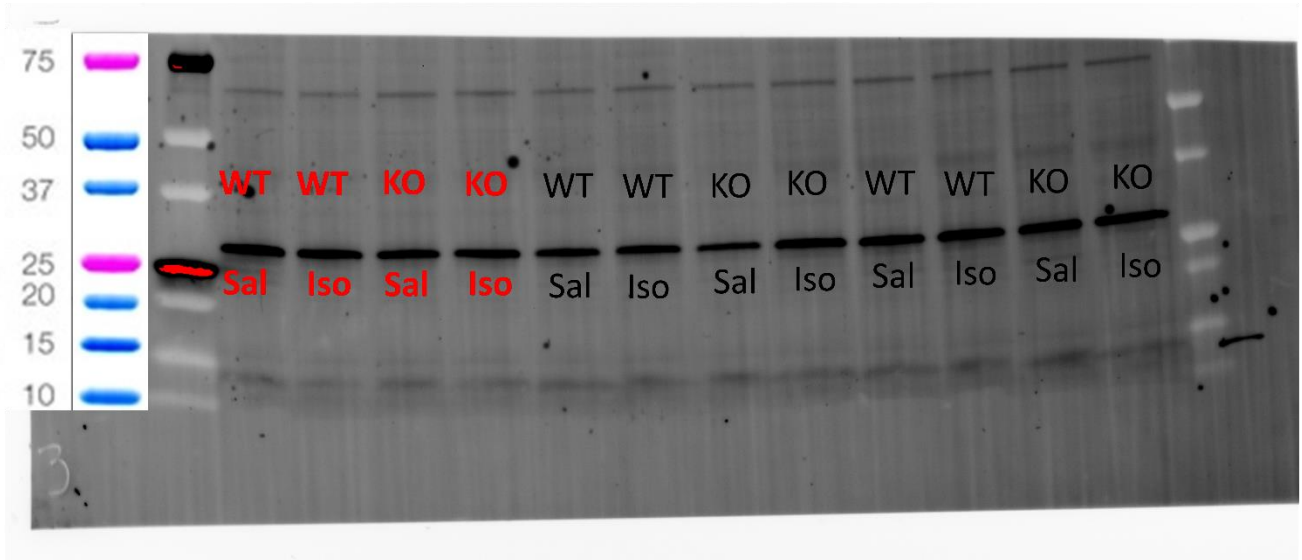

# pTnl

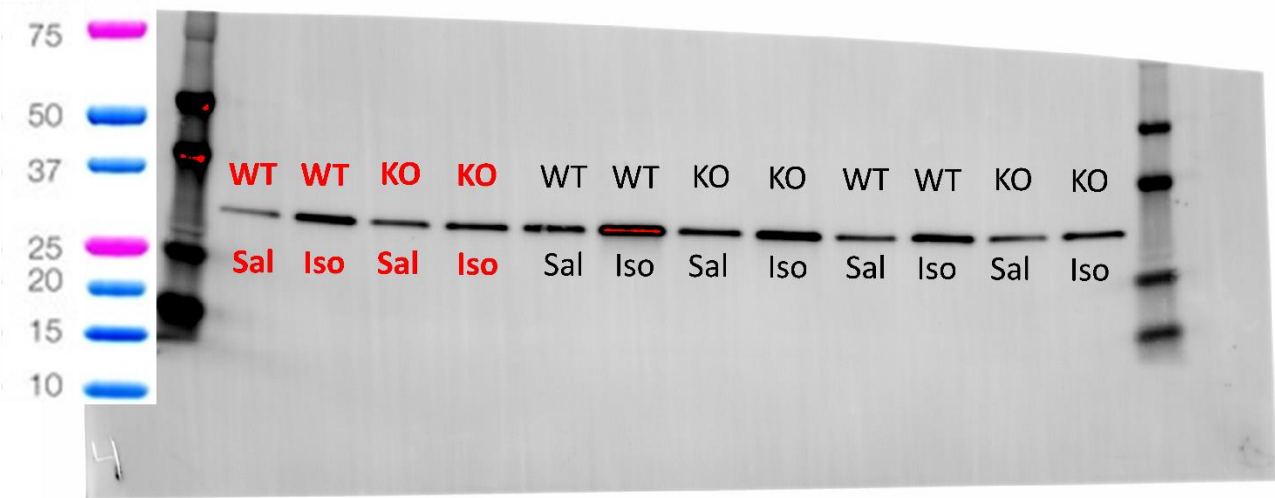

Full blots used on Figure 5Ca

# GAPDH

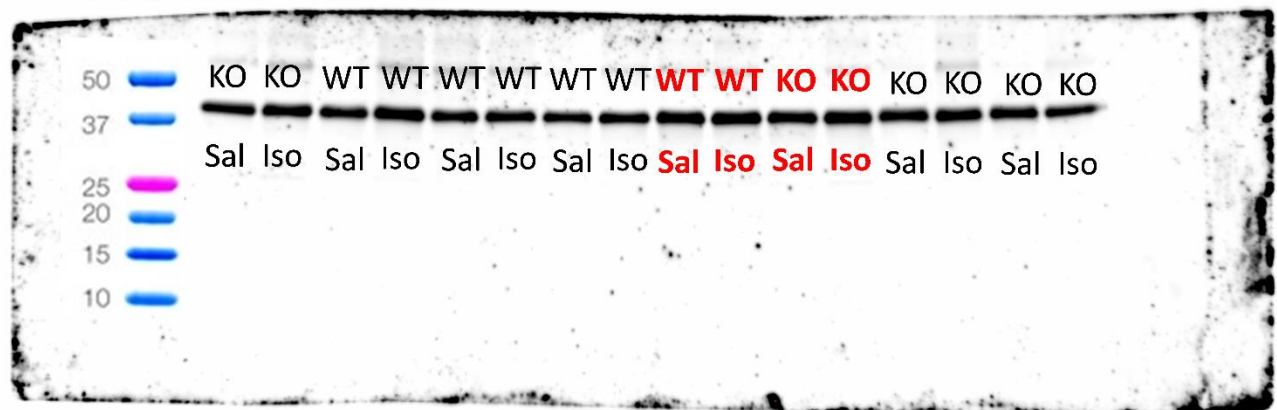

## Total RyR

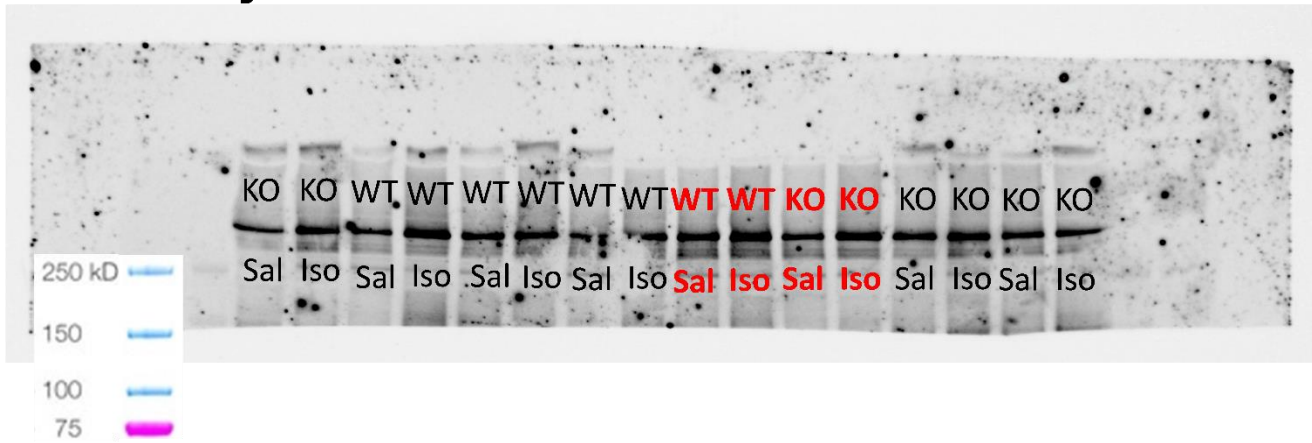

## pRyR Ser 2814

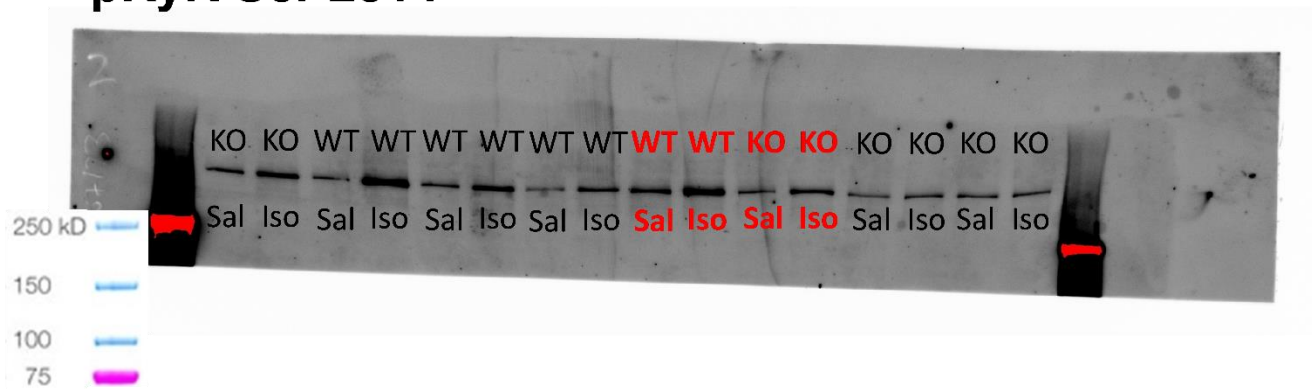

## pRyR Ser2808

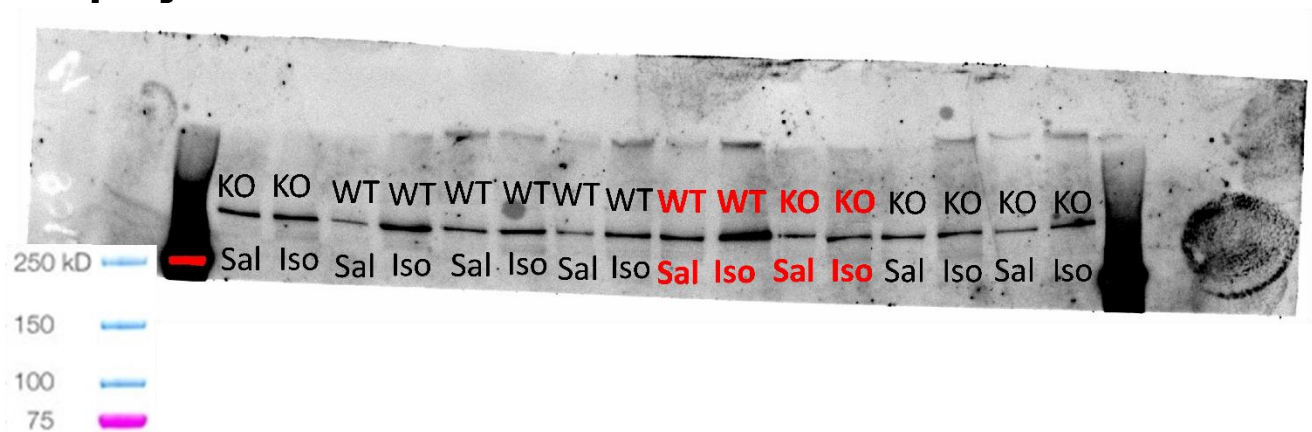

Full blots used on Figure 5Da

## GAPDH

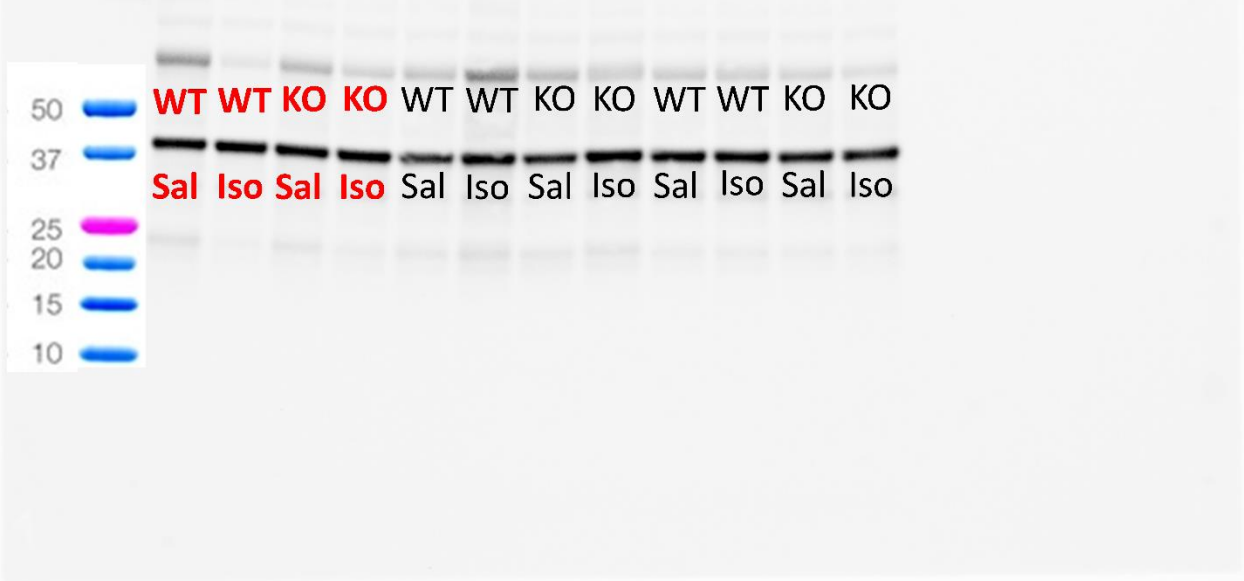

## Total SERCA2

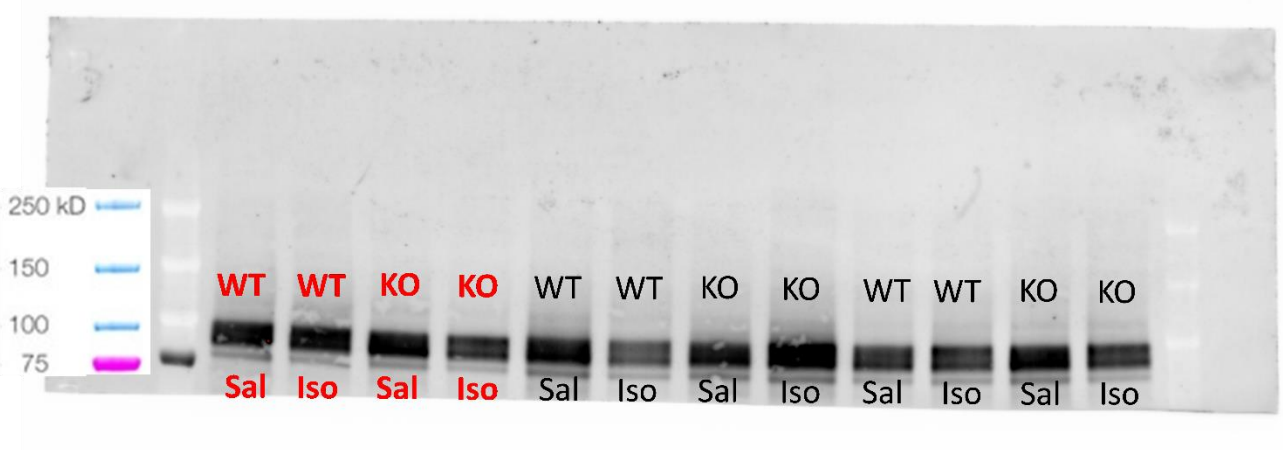

Supplement: NIHMS1999885-supplement-1.pdf [file NIHMS1999885-supplement-1.pdf]
